# Supplementary material for: Comprehensive Temporal Protein Dynamics during Postirradiation Recovery in Deinococcus radiodurans
Source: Hindawi journal article supplement (doi:10.1155/2022/1622829), 2022-01-01

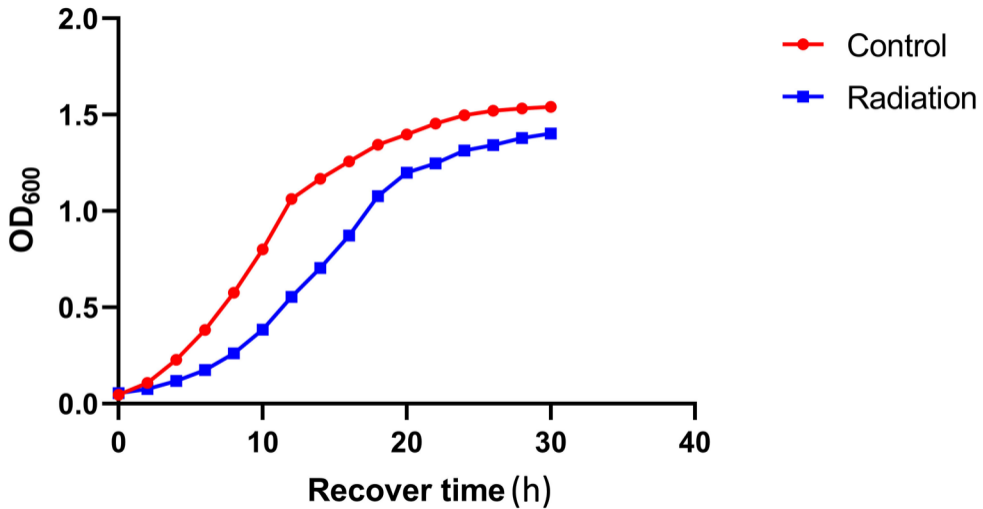

Supplement: f1 [file 1622829.f1.pdf]
